# Supplementary material for: Ball milling synthesis of Fe 3 O 4 nanoparticles-functionalized porous boron nitride with enhanced cationic dye removal performance
Source: Royal Society of Chemistry journal article supplement (doi:10.1039/d3ra07557e), 2024-01-01
Supplement: d3ra07557e1.pdf [file d3ra07557e1.pdf]

Electronic supplementary information

## Ball milling synthesis of Fe<sub>3</sub>O<sub>4</sub> nanoparticles-functionalized porous boron nitride with enhanced cationic dye removal performance

Jie Li<sup>1,2</sup>, Chuanhui Wang<sup>1,2</sup>, Xinqi Chen<sup>1,2</sup>, Yunxiu Ma<sup>1,2</sup>, Chu Dai<sup>1,2</sup>, Hui Yang<sup>1,2</sup>, Qian Li<sup>2</sup>, Junhui Tao<sup>1,2,\*</sup>, Tian Wu<sup>1,2</sup>

<sup>1</sup> School of Physics and Mechanical & Electronical Engineering, Institute for Functional Materials, Hubei University of Education, Wuhan, 430205, P.R. China

<sup>2</sup> Institute of Materials Research and Engineering, Hubei Expert workstation for Terahertz Technology and Advanced Energy Materials and Devices, Hubei University of Education, Wuhan, 430205, P.R. China.

\* Corresponding author. Tel.: +86-27-52363361; fax: +86-27-52363361

E-mail address: junhuitao@hue.edu.cn (J. Tao)

**Fig. S1** (a) XRD patterns of Fe<sub>3</sub>O<sub>4</sub>/PBN2 and Fe<sub>3</sub>O<sub>4</sub>/PBN3. (b) FTIR spectra of Fe<sub>3</sub>O<sub>4</sub>/PBN2 and Fe<sub>3</sub>O<sub>4</sub>/PBN3.

**Fig. S2** Effect of temperature on the adsorption performance of  $\text{Fe}_3\text{O}_4/\text{PBN1}$  for MB.

**Fig. S3** Effect of the different water sources on the adsorption performance of  $\text{Fe}_3\text{O}_4/\text{PBN}$  for MB.

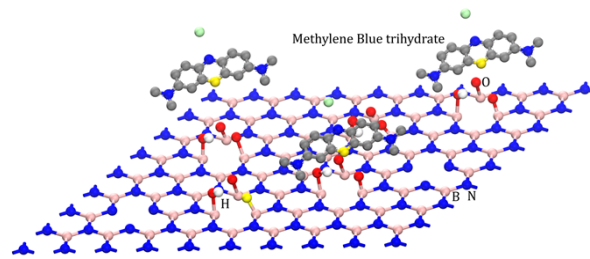

**Fig. S4** Schematic diagram of the interaction mechanism between the dye molecules and the Fe<sub>3</sub>O<sub>4</sub>/PBN.

**Fig. S5** Reusability of Fe<sub>3</sub>O<sub>4</sub>/PBN1 for MB regenerated by catalytic degradation method with the assistance of H<sub>2</sub>O<sub>2</sub>.

**Fig. S6** Zeta-potential vs. pH values of the regenerative Fe<sub>3</sub>O<sub>4</sub>/PBN1 after the tenth cycle.
